# Supplementary material for: Preferential Disomic Segregation and C. micrantha/C. medica Interspecific Recombination in Tetraploid ‘Giant Key’ Lime; Outlook for Triploid Lime Breeding
Source: Front Plant Sci. 2020 Jun 25;11:939. doi: 10.3389/fpls.2020.00939 (PMC7330052; doi:10.3389/fpls.2020.00939)
Supplement: Supplementary file 4 [file Table_3.xlsx]

## Sheet: Feuil1
Ahmed D., Curk F., Froelicher Y. and Ollitrault P. 2020.Preferential disomic segregation and C. micrantha / C. medica interspecific recombination in tetraploid ‘Giant Key’ lime; outlook for triploid lime breeding. Frontiers in Plant Science
Supplementary Table 3: Number of interspecific recombinations and percentage of the three C. medica/C. micrantha genotypic configurations in the diploid gamete producing the triploid hybrids.
Hybrids	NA (%)	C. medica homozygosity (%)	C. micrantha/C. medica heterozygosity (%)	C. micrantha homozygosity (%)	Number of recombination
ALL:B01	0	0	100	0	0
ALL:C01	0	0.8	96.4	2.7	6
ALL:D01	0.6	0.8	89.9	8.7	5
ALL:E01	2.1	0	90.5	7.4	1
ALL:F01	0.6	6.1	90.8	2.5	5
ALL:G01	0.3	0	99.7	0	0
ALL:H01	9	4.8	83.5	2.7	2
ALL:K01	0	1.6	98.4	0	1
ALL:L01	4.4	3	85.1	7.5	3
ALL:M01	0	11	84.6	4.4	7
ALL:N01	0	10.6	89.4	0	0
ALL:O01	0	19.3	80.7	0	4
ALL:P01	7.2	0	92.8	0	0
ALL:B02	0	0	88.7	11.3	2
ALL:C02	0	1.3	93.4	5.3	2
ALL:D02	1.2	0	89.5	9.3	4
ALL:E02	0	11.1	83.6	5.3	3
ALL:F02	0.8	14.8	65	19.4	4
ALL:G02	3.1	1.8	95.1	0	1
ALL:H02	0	11.4	83.7	4.9	7
ALL:J02	0	0	99.4	0.6	1
ALL:K02	0	22.2	67.2	10.6	2
ALL:L02	0.1	12.5	76.8	10.6	2
ALL:M02	0	0	100	0	0
ALL:O02	1.3	10.6	61.7	26.3	6
ALL:P02	2.2	6.5	91.3	0	2
ALL:B03	0.2	10.2	80.5	9	9
ALL:C03	0	0	86.1	13.9	1
ALL:D03	0	4.8	89.3	5.9	5
ALL:F03	0.2	0	99.7	0.1	2
ALL:G03	0	1.2	98.8	0	2
ALL:H03	0	12.1	70.8	17	12
ALL:J03	0	3.3	96.7	0	1
ALL:K03	0	3.4	67	29.6	5
ALL:L03	0	28.3	71.7	0	6
ALL:M03	0	11.1	87.4	1.5	3
ALL:N03	0.8	0	93.8	5.4	1
ALL:O03	0	0	75.6	24.4	3
ALL:P03	3.9	5.3	72.4	18.3	6
ALL:B04	0.9	28.2	41.6	29.4	10
ALL:D04	0.9	0	96.8	2.3	2
ALL:E04	1.9	1.8	96.3	0	2
ALL:F04	0.8	12.9	73.4	12.9	5
ALL:G04	1.7	4.2	94.1	0	1
ALL:H04	0	19.2	71	9.7	8
ALL:J04	0	0	93.7	6.3	0
ALL:K04	0	9.1	90.9	0	0
ALL:L04	0.9	22	75.3	1.7	5
ALL:M04	6.4	3.9	89.6	0	1
ALL:N04	0.1	1.2	87.2	11.6	6
ALL:O04	0	9.4	90.3	0.2	3
ALL:P04	0.8	10.8	84	4.4	4
ALL:C05	0.1	0	95.1	4.8	2
ALL:D05	1.2	11	82	5.8	4
ALL:E05	0.9	0	92.1	6.9	2
ALL:F05	0.7	2.1	79.7	17.5	4
ALL:G05	0.1	0	99.9	0	0
ALL:J05	0	11	84.7	4.3	3
ALL:K05	0.5	3.8	93.3	2.5	6
ALL:L05	0	1.8	98.2	0	1
ALL:M05	0	9.5	88.4	2.2	4
ALL:N05	0	2.9	88	9.1	3
ALL:O05	2.3	0	97.7	0	0
ALL:P05	0	0	82.4	17.6	2
ALL:B06	0	11.1	88.9	0	0
ALL:C06	1.4	17.8	77.4	3.4	2
ALL:D06	2.8	11.7	78.8	6.6	4
ALL:E06	1.4	6.9	77.6	14.1	5
ALL:F06	0	10.8	81.9	7.4	10
ALL:G06	5.2	0	84.2	10.6	0
ALL:H06	0	0	100	0	0
ALL:J06	0	29.2	69.3	1.6	6
ALL:K06	5	5.2	84.9	4.8	3
ALL:L06	0	7.9	90	2.1	4
ALL:M06	0.9	0.6	94.1	4.4	2
ALL:O06	0	4.2	94.8	1	5
ALL:P06	0.2	6.3	84.5	9	5
ALL:B07	1.1	0	98.9	0	0
ALL:C07	1.4	6.3	83.3	9	4
ALL:D07	0	6.4	74.4	19.2	5
ALL:E07	0	6.8	84.6	8.6	8
ALL:G07	0	8.3	84.7	7	3
ALL:H07	0	0	86.1	13.9	2
ALL:J07	1.1	0	98.9	0	0
ALL:K07	0.2	6.6	71.1	22	6
ALL:L07	0.1	4.8	95.1	0	2
ALL:M07	0.7	8.8	86.1	4.4	4
ALL:N07	0	26	72.7	1.2	1
ALL:O07	1.1	7.4	79.2	12.3	4
ALL:P07	0	4.2	92.1	3.7	2
ALL:B08	0	11.1	88.9	0	1
ALL:C08	11.1	0	88.9	0	0
ALL:D08	0	28	59.7	12.3	9
ALL:E08	4.1	17.6	72.9	5.4	4
ALL:F08	0	0	97.5	2.5	2
ALL:G08	0	11.5	83.2	5.3	4
ALL:K08	0	0	86.3	13.7	2
ALL:L08	1.8	0	92.5	5.7	2
ALL:M08	0	4.9	91.2	3.9	4
ALL:N08	2.8	0.8	96	0.3	3
ALL:O08	0.2	16.6	82.7	0.5	3
ALL:P08	0.2	14.3	84.1	1.5	2
ALL:B09	0.8	7.6	91.7	0	2
ALL:C09	0	26	69.5	4.4	3
ALL:D09	0.2	17.8	81.5	0.5	6
ALL:E09	1.2	0	69.4	29.4	3
ALL:F09	0	3.9	96.1	0	1
ALL:G09	3.3	15.4	78.3	3.1	4
ALL:H09	3.7	2.6	89.2	4.6	3
ALL:J09	0	4.3	95.7	0	3
ALL:K09	0	13.4	80.6	6	6
ALL:M09	1.1	0	98.9	0	0
ALL:N09	0	0	95.5	4.5	1
ALL:O09	1.4	0	98.6	0	0
ALL:P09	0.4	0	99.6	0	0
ALL:B10	0.9	7.1	90.7	1.2	4
ALL:C10	0	1.5	98.5	0	3
ALL:E10	0.7	4.2	88.8	6.3	4
ALL:F10	0	0	100	0	0
ALL:G10	1.6	6.4	78	14	3
ALL:J10	1.8	0	83.3	14.8	4
ALL:L10	0	16.2	77.9	5.9	6
ALL:M10	0	0	100	0	0
ALL:N10	0	0	91.7	8.3	1
ALL:O10	0	7.9	84.3	7.8	5
ALL:P10	0.2	0	81.5	18.3	2
ALL:B11	1.8	5.1	74.4	18.6	9
ALL:C11	12.5	0	77.1	10.4	3
ALL:D11	0	1.8	98.2	0	1
ALL:E11	0	5.3	94.7	0	3
ALL:F11	2.3	0	89.9	7.8	2
ALL:H11	0	0	100	0	0
ALL:K11	0	27	62	11	6
ALL:L11	0.8	0	95	4.2	1
ALL:M11	2	1.6	93.1	3.3	2
ALL:N11	0.5	19.9	79.6	0	2
ALL:O11	2.2	5.3	85.9	6.6	3
ALL:P11	0.2	3.3	94.2	2.4	3
ALL:A12	0.4	25.1	72.5	2.1	5
ALL:B12	1	10.8	72.9	15.3	9
ALL:C12	0	0	85.1	14.9	7
ALL:D12	2.8	1.5	83.2	12.5	8
ALL:E12	1.4	5.8	85.5	7.3	3
ALL:G12	0.7	16.8	82.5	0	2
ALL:H12	7.4	0	80.2	12.4	1
ALL:J12	0	19.8	80.2	0	3
ALL:K12	1.1	0	97.4	1.6	1
ALL:L12	0	0	100	0	0
ALL:N12	0	4.4	80.6	15	1
ALL:O12	0.2	7.1	81.3	11.4	6
ALL:P12	0.1	0	99.9	0	0
ALL:C13	0.2	7.7	82.8	9.3	8
ALL:D13	0	3.1	96.9	0	1
ALL:E13	0.1	5.6	90.5	3.9	6
ALL:F13	0.5	9.5	64.5	25.6	10
ALL:G13	0	7.7	90.9	1.4	10
ALL:H13	2.2	12.2	72.5	13.2	4
ALL:K13	0	2.3	90.6	7.1	5
ALL:L13	1.9	0	98.1	0	0
ALL:M13	0.8	5.4	93.8	0	2
ALL:D14	1.9	6	77.3	14.8	5
ALL:E14	1	0	69.4	29.6	2
ALL:F14	0	9.5	90.5	0	4
ALL:G14	0	23.8	53.6	22.6	7
ALL:H14	2.6	0	97.1	0.2	1
ALL:K14	0	5.1	94.9	0	2
ALL:L14	0.1	0	93.3	6.6	3
ALL:M14	2	28.5	69	0.5	3
ALL:B15	0.1	0	94.4	5.5	3
ALL:C15	1.4	2	96.7	0	1
ALL:E15	0	4.3	95.7	0	5
ALL:F15	0	3.4	85.6	11	4
ALL:G15	0	24.9	75.1	0	5
ALL:H15	0	0	94.6	5.4	2
ALL:K15	0	2.7	91.4	5.9	3
ALL:L15	0	1.4	93.1	5.5	2
ALL:M15	3.8	0	95.6	0.6	2
ALL:B16	0.5	1.1	93.1	5.3	3
ALL:C16	1.6	0	98.4	0	0
ALL:D16	2.3	13.2	80.8	3.7	9
ALL:E16	0.8	1	94.1	4.1	3
ALL:F16	0	7.6	92.4	0	1
ALL:G16	0.2	1.5	98.3	0	3
ALL:H16	0.1	0	86.6	13.4	3
ALL:M16	0	0.8	99.2	0	1
ALL:B17	0	5	93.2	1.8	5
ALL:D17	1.2	0	98.1	0.6	1
ALL:F17	0	17.7	80.1	2.3	4
ALL:G17	1.4	2	88.4	8.3	3
ALL:H17	0	3.3	89	7.7	6
ALL:K17	0	5.3	82.3	12.5	8
ALL:L17	0	0	89.2	10.8	4
ALL:B18	0	4.4	78.9	16.7	2
ALL:C18	0	3.7	92.3	4.1	7
ALL:D18	0.3	0	98.2	1.5	1
ALL:E18	2.8	0.6	91.7	4.8	3
ALL:F18	1.4	1.9	65.8	31	7
ALL:G18	2.7	2.2	86	9.2	5
ALL:H18	2.8	4.4	85.9	7	3
ALL:K18	0	0	100	0	0
ALL:L18	2.3	13.5	73.8	10.5	7
ALL:B19	0	0	100	0	0
ALL:C19	3	28.7	62.9	5.4	5
ALL:E19	2.8	18.2	78.9	0	2
ALL:F19	1.5	9.6	78.2	10.7	8
ALL:G19	0.8	5.6	82	11.7	9
ALL:H19	2.2	5	86.2	6.6	4
ALL:B20	0.2	3.4	94.9	1.5	2
ALL:C20	0.2	0	99.2	0.6	1
ALL:D20	0	4.4	91.5	4.2	2
ALL:E20	0	4.8	90.7	4.5	2
ALL:F20	1.2	11.3	86.7	0.8	5
ALL:G20	1.4	0	84.8	13.9	1
ALL:H20	0.8	0	81.8	17.4	3
ALL:K20	0	0	97.8	2.2	1
ALL:L20	1.1	9.4	89.5	0	1
ALL:B21	0	5.7	94.3	0	2
ALL:C21	0	9.1	90.9	0	1
ALL:D21	0.4	2.8	81.6	15.3	3
ALL:E21	2.3	1.9	83.7	12.1	4
ALL:F21	2.8	0	95.4	1.7	3
ALL:G21	0.2	7.8	91.4	0.6	9
ALL:H21	2.1	7.9	89.9	0.2	5
ALL:K21	0	1.8	96.1	2.1	4
ALL:L21	0	18	79.8	2.2	10
ALL:B22	0.2	14.7	52.9	32.2	5
ALL:C22	0	0	100	0	0
ALL:E22	0	4.9	70.4	24.7	6
ALL:F22	1.2	9.4	89.5	0	3
ALL:G22	2.3	0	94.7	3	1
ALL:H22	1.4	29.9	61.2	7.5	2
ALL:K22	0	0	93.1	6.9	1
ALL:L22	2.7	18.4	78.9	0	2
ALL:B23	1.8	9.1	87.7	1.4	5
ALL:C23	0	14.7	81.2	4.2	2
ALL:D23	2.2	1	91.7	5.1	4
ALL:E23	0.8	17.2	82	0	2
ALL:F23	0	4.7	95.3	0	2
ALL:G23	0	4.4	82.3	13.3	4
ALL:H23	1.1	0	95.6	3.3	2
ALL:J23	0.6	34	65.4	0	7
ALL:L23	1.4	7.3	71.1	20.2	8
ALL:B24	0	0.5	86.6	12.9	5
ALL:C24	0.5	0	96.8	2.7	1
ALL:D24	1.3	4.1	93.2	1.4	3
ALL:F24	0	8.3	84	7.7	4
ALL:G24	0	7.5	92.5	0	2
ALL:H24	0.7	7.2	90.6	1.5	7
ALL:J24	15.2	13.3	71.5	0	2
ALL:K24	2.5	18.3	77.9	1.3	7
NA: missing data
